# Supplementary material
Source: Copernicus journal article supplement (doi:10.5194/egqsj-17-69-1966)
Supplement: Supplementary file 1 [file egqsj-17-69-1966-supplement.pdf]

# WESTRHAUDERFEHN

ANALYSEN: K.-E. BEHRE

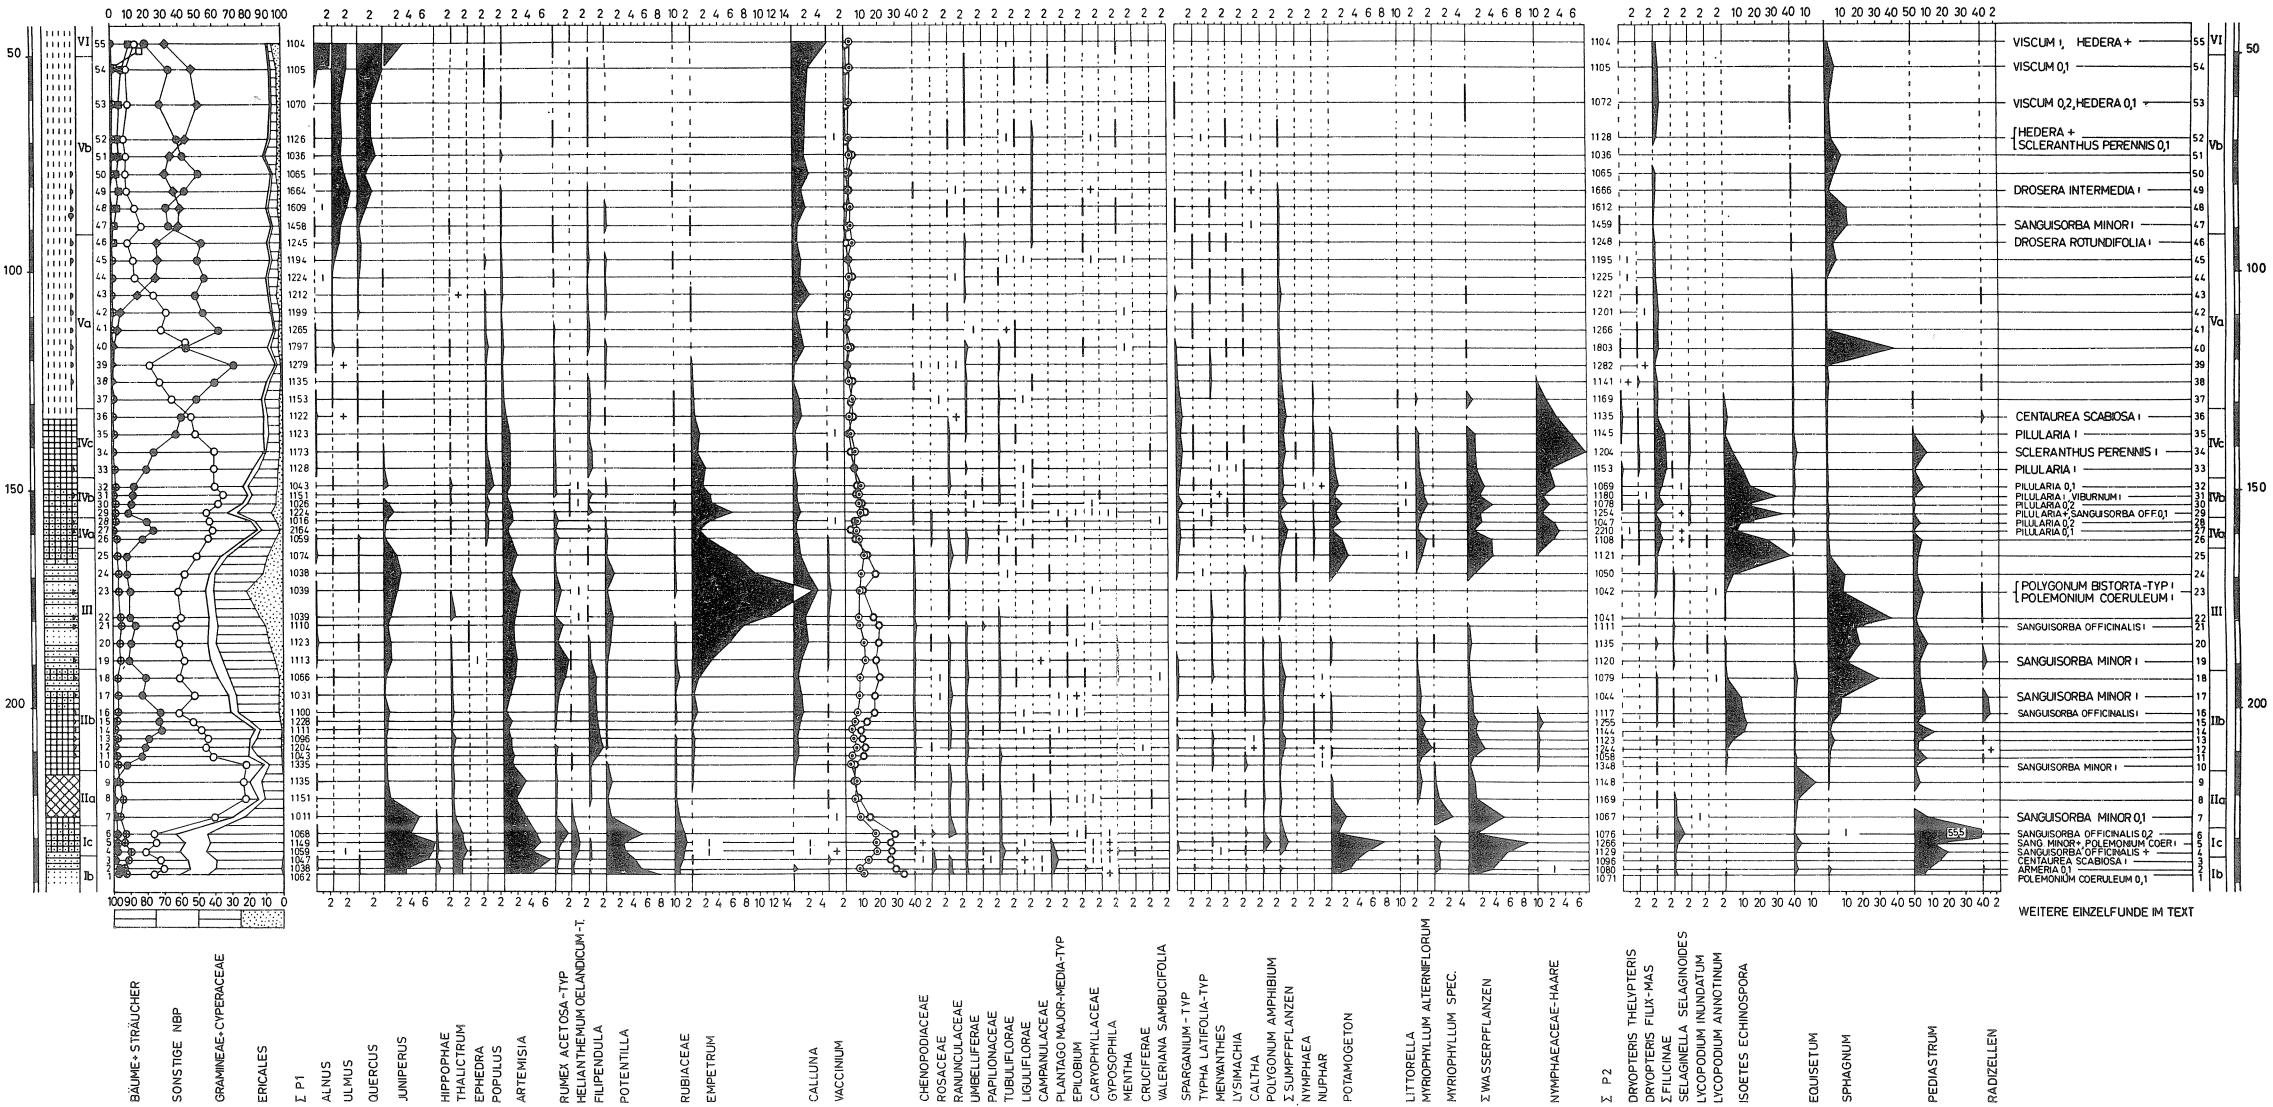

Abb. 2. Hauptpollendiagramm Westrhauderfehn. Zeichenerklärung siehe Abb. 4!
